# Supplementary material
Source: bioRxiv or medRxiv preprint supplement (https://medrxiv.org/highwire/filestream/89931/field_highwire_adjunct_files/7/2020.07.16.20153437-16.pdf)

# Gene usage in cluster of CD8 T cells

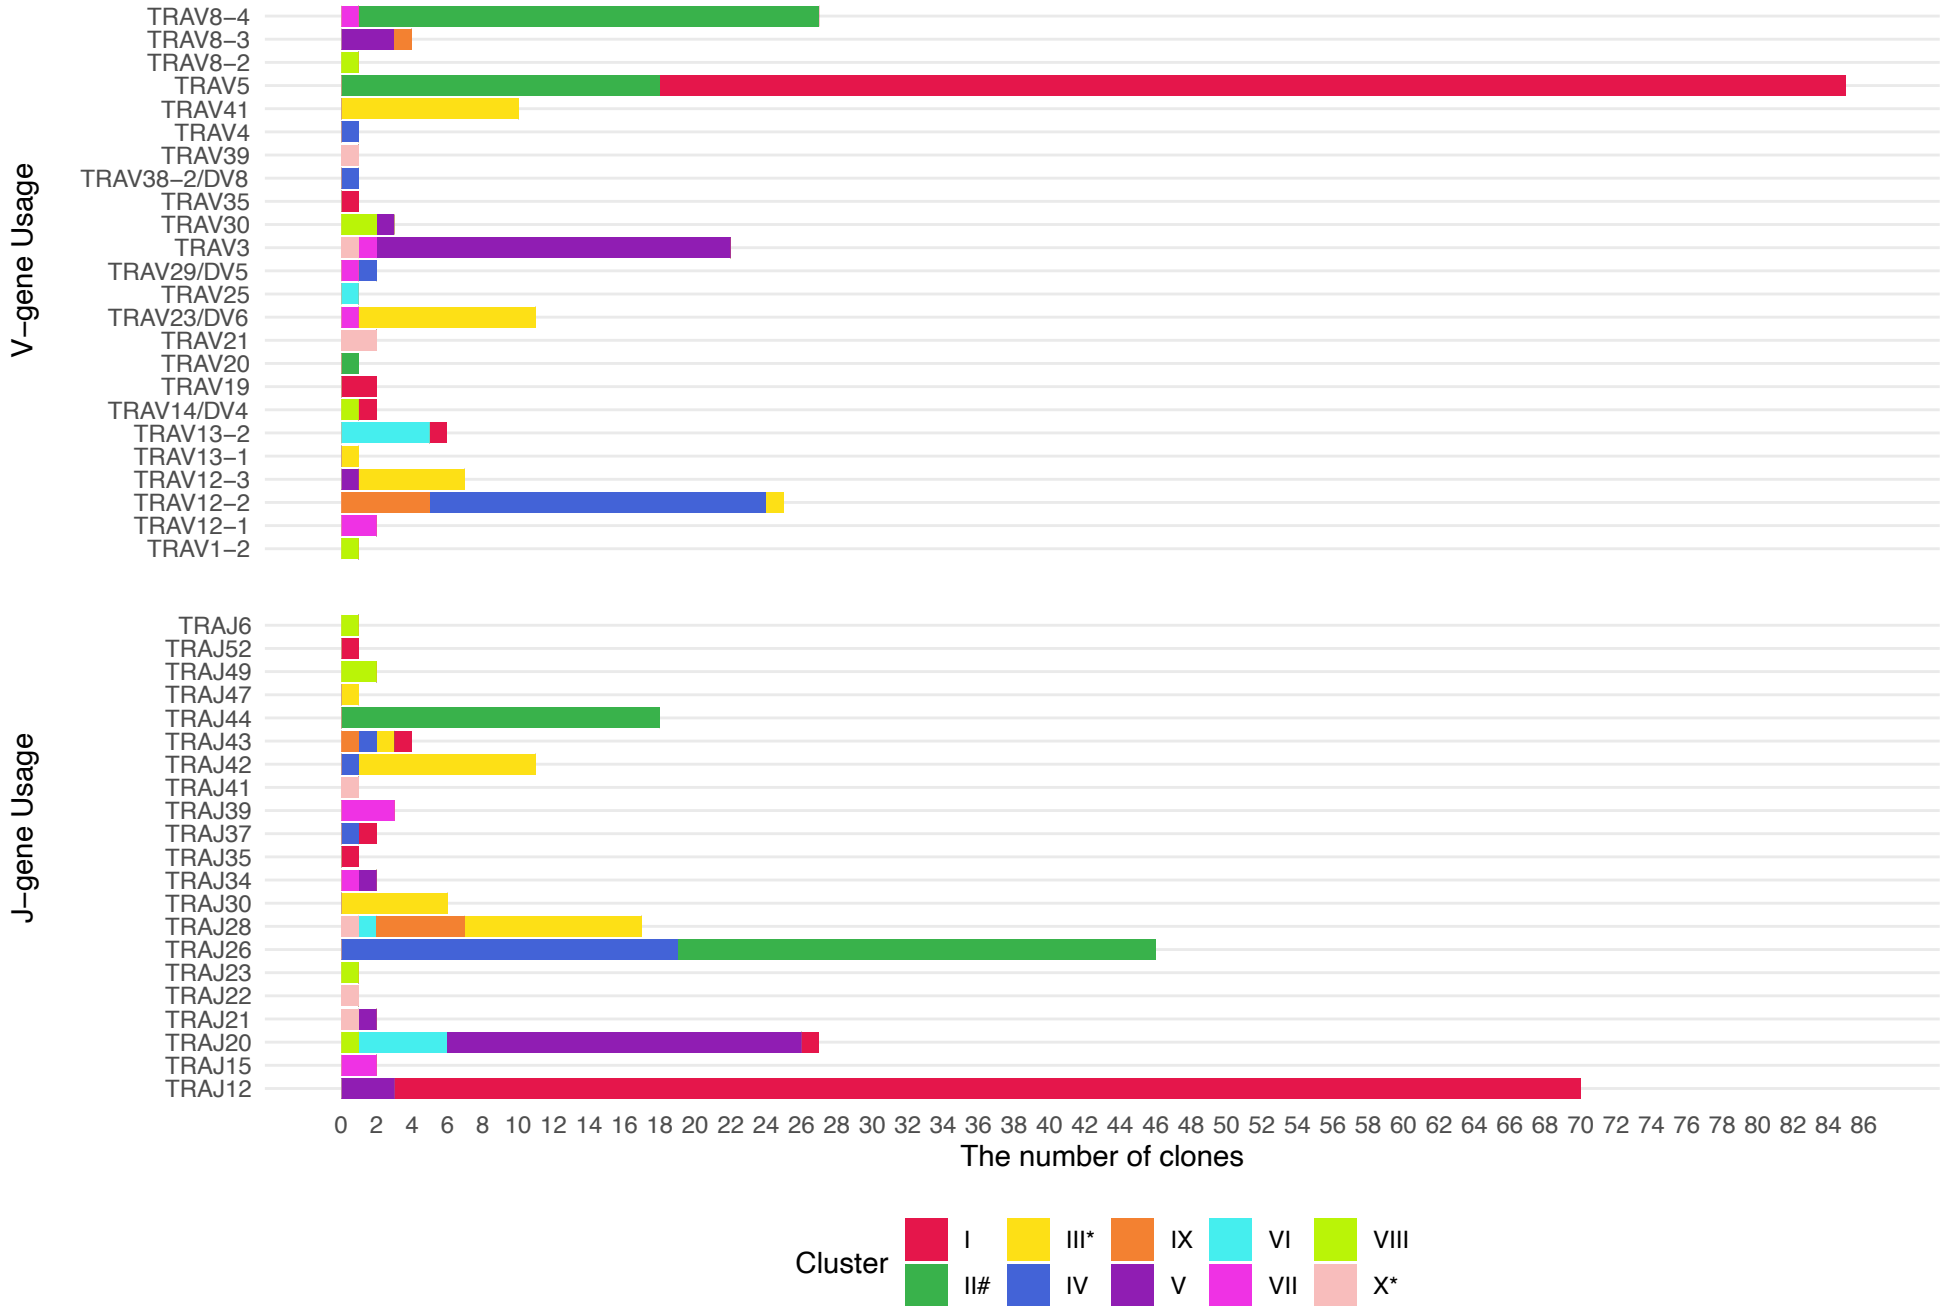

Supplement: Supplementary file [file 2020.07.16.20153437-16.pdf]
